# Supplementary material
Source: HighWire-hosted journal article supplement (https://www.cancerbiomed.org/content/j.issn.2095-3941.2023.0382.1)

A

| Immune Cell                     | LDHB low patients |         | LDHB high patients |         | LDHA low patients |         | LDHA high patients |         |
|---------------------------------|-------------------|---------|--------------------|---------|-------------------|---------|--------------------|---------|
|                                 | HR                | P-value | HR                 | P-value | HR                | P-value | HR                 | P-value |
| CD8 <sup>+</sup> naive T-cells  | 0.7117            | 0.1417  | 0.5339             | 0.0069  | 0.5957            | 0.0222  | 0.6780             | 0.0972  |
| cDC                             | 0.8879            | 0.6061  | 0.5820             | 0.0181  | 0.7164            | 0.1352  | 0.8658             | 0.5285  |
| NK cells                        | 1.2231            | 0.3827  | 0.5942             | 0.0235  | 0.5239            | 0.0045  | 1.3021             | 0.2483  |
| CD8 <sup>+</sup> T-cells        | 0.8780            | 0.5723  | 0.6211             | 0.0388  | 0.7781            | 0.2755  | 0.7271             | 0.1679  |
| pro B-cells                     | 0.9203            | 0.7181  | 0.6706             | 0.0796  | 0.7482            | 0.2035  | 0.9012             | 0.6481  |
| pDC                             | 0.8124            | 0.3672  | 0.6946             | 0.1108  | 0.7042            | 0.1239  | 0.7299             | 0.1720  |
| DC                              | 1.0030            | 0.9897  | 0.7054             | 0.1234  | 1.0646            | 0.7805  | 0.9272             | 0.7407  |
| Class-switched memory B-cells   | 0.6550            | 0.0680  | 0.7172             | 0.1497  | 0.6685            | 0.0780  | 0.7578             | 0.2288  |
| CD8 <sup>+</sup> Tcm            | 0.7243            | 0.1622  | 0.7318             | 0.1734  | 0.5532            | 0.0098  | 0.9218             | 0.7212  |
| CD4 <sup>+</sup> T-cells        | 1.2483            | 0.3355  | 0.7462             | 0.1962  | 0.9411            | 0.7924  | 1.0720             | 0.7610  |
| NKT                             | 0.6948            | 0.1140  | 0.7581             | 0.2325  | 0.8085            | 0.3588  | 0.9484             | 0.8169  |
| CD4 <sup>+</sup> Tcm            | 1.9332            | 0.0042  | 0.7797             | 0.2776  | 1.1159            | 0.6313  | 1.2798             | 0.2798  |
| CD4 <sup>+</sup> Tem            | 0.7109            | 0.1351  | 0.7820             | 0.2861  | 0.8660            | 0.5316  | 0.6264             | 0.0425  |
| CD4 <sup>+</sup> memory T-cells | 1.1384            | 0.5756  | 0.7975             | 0.3204  | 0.9022            | 0.6551  | 1.0560             | 0.8108  |
| CD4 <sup>+</sup> naive T-cells  | 0.8004            | 0.3367  | 0.8173             | 0.3748  | 0.6898            | 0.1090  | 0.7193             | 0.1547  |
| Monocytes                       | 0.8945            | 0.6274  | 0.8227             | 0.3928  | 0.8405            | 0.4520  | 0.9968             | 0.9886  |
| B-cells                         | 0.8161            | 0.3803  | 0.8562             | 0.4972  | 0.7450            | 0.2032  | 0.8181             | 0.3842  |
| Memory B-cells                  | 1.3256            | 0.2185  | 0.9044             | 0.6581  | 1.2008            | 0.4289  | 0.9941             | 0.9794  |
| aDC                             | 1.0372            | 0.8738  | 0.9109             | 0.6823  | 0.9663            | 0.8810  | 1.2263             | 0.3726  |
| iDC                             | 1.2242            | 0.3807  | 0.9260             | 0.7343  | 0.8870            | 0.6020  | 1.3203             | 0.2209  |
| Macrophages M1                  | 1.2745            | 0.2900  | 0.9888             | 0.9608  | 0.9924            | 0.9733  | 1.3346             | 0.2040  |
| naive B-cells                   | 1.0310            | 0.8936  | 0.9936             | 0.9776  | 1.0338            | 0.8849  | 1.2485             | 0.3324  |
| Macrophages                     | 1.2682            | 0.3010  | 1.0100             | 0.9653  | 1.1042            | 0.6634  | 1.1044             | 0.6639  |
| CD8 <sup>+</sup> Tem            | 0.8088            | 0.3628  | 1.0210             | 0.9275  | 0.9047            | 0.6645  | 0.7960             | 0.3219  |
| Th1 cells                       | 1.5979            | 0.0486  | 1.0964             | 0.6794  | 1.4258            | 0.1245  | 1.1582             | 0.5186  |
| Myocytes                        | 1.3755            | 0.1669  | 1.1303             | 0.5920  | 1.0305            | 0.8961  | 1.4057             | 0.1316  |
| Th2 cells                       | 0.9070            | 0.6715  | 1.2190             | 0.3857  | 1.0830            | 0.7295  | 1.2416             | 0.3449  |
| Platelets                       | 1.0235            | 0.9196  | 1.2228             | 0.3789  | 1.4016            | 0.1439  | 0.9695             | 0.8923  |
| Neutrophils                     | 1.1735            | 0.4835  | 1.2242             | 0.3788  | 1.5785            | 0.0439  | 0.8974             | 0.6382  |
| Macrophages M2                  | 1.2980            | 0.2529  | 1.3729             | 0.1626  | 1.1588            | 0.5209  | 1.3998             | 0.1365  |
| Tregs                           | 0.7564            | 0.2291  | 1.5808             | 0.0484  | 1.1000            | 0.6787  | 1.1014             | 0.6728  |

B

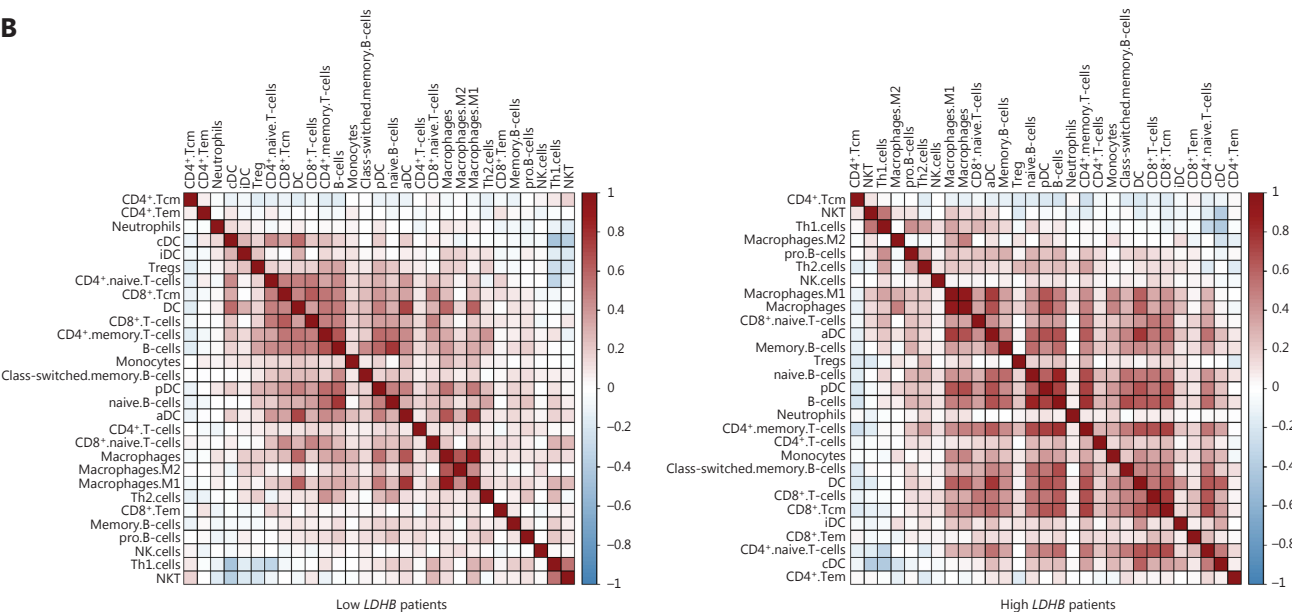

C

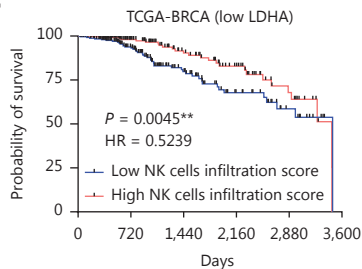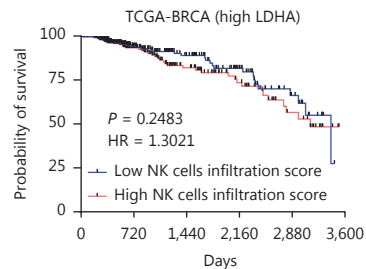

Supplement: media-6 [file media-6.pdf]
