# Supplementary material
Source: HighWire-hosted journal article supplement (https://www.cancerbiomed.org/content/j.issn.2095-3941.2023.0382.1)
Supplement: media-7 [file media-7.pdf]

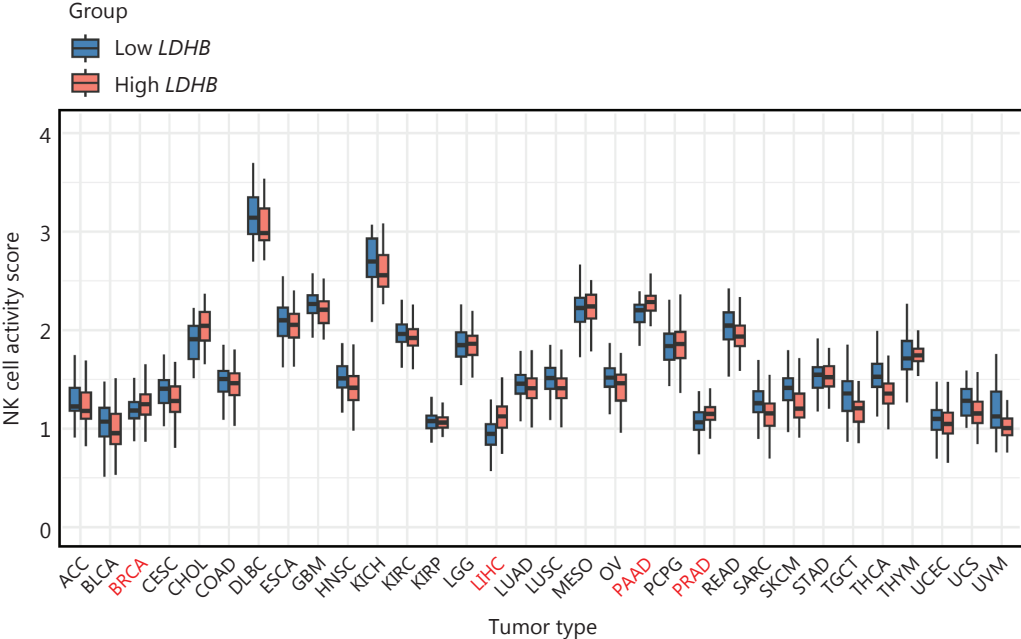

| Tumor_type | P_value   |
|------------|-----------|
| THCA       | 4.88E-30  |
| LIHC       | 1.97E-23  |
| BRCA       | 1.66E-12  |
| PRAD       | 1.62E-11  |
| HNSC       | 2.80E-11  |
| SARC       | 2.41E-09  |
| LUSC       | 8.30E-09  |
| OV         | 3.96E-07  |
| CESC       | 1.66E-06  |
| PAAD       | 2.69E-06  |
| TGCT       | 6.72E-06  |
| SKCM       | 0.0001618 |
| UVM        | 0.0005469 |
| BLCA       | 0.0006898 |
| KIRC       | 0.0008503 |
| GBM        | 0.0025358 |
| LUAD       | 0.0086871 |
| UCEC       | 0.0099214 |
| READ       | 0.018743  |
| UCS        | 0.0684427 |
| CHOL       | 0.0900718 |
| COAD       | 0.1409305 |
| ACC        | 0.1869479 |
| DLBC       | 0.1992459 |
| KIRP       | 0.2845201 |
| PCPG       | 0.5450959 |
| STAD       | 0.7082977 |
| LGG        | 0.8850189 |
| MESO       | 0.8974778 |
| THYM       | 0.9506425 |
