# Supplementary material
Source: HighWire-hosted journal article supplement (https://www.cancerbiomed.org/content/j.issn.2095-3941.2023.0382.1)

**A**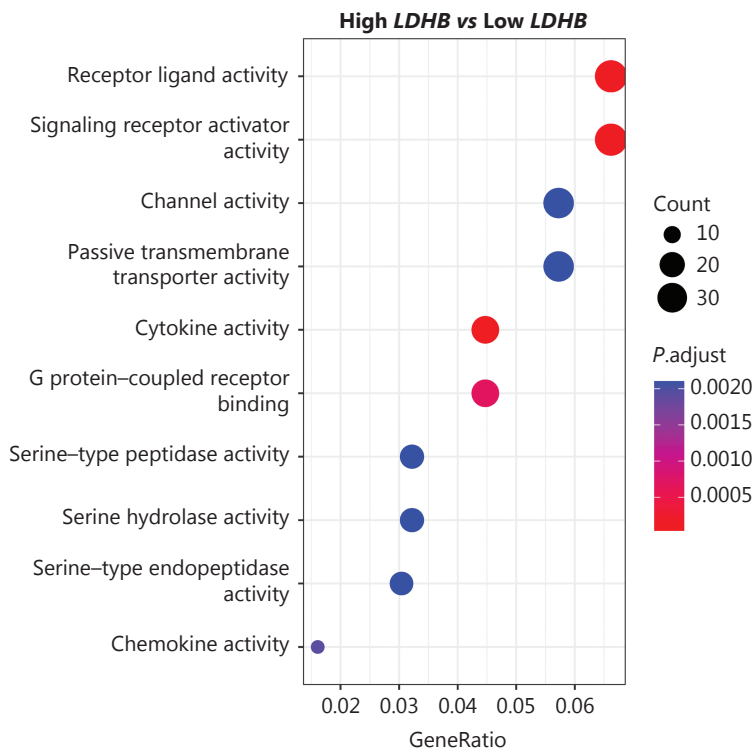**B**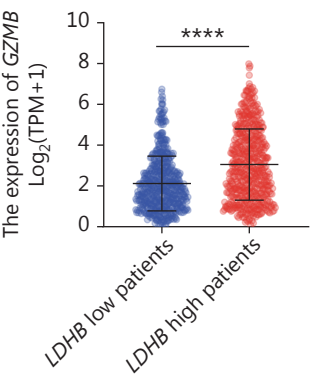**C**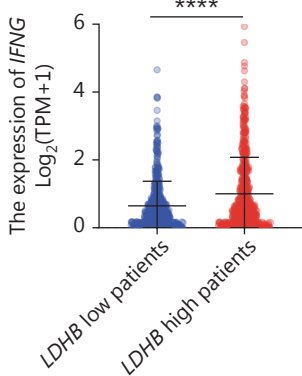**D**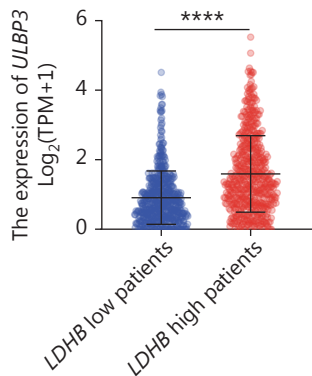**E**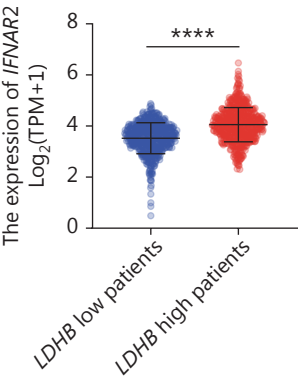**F**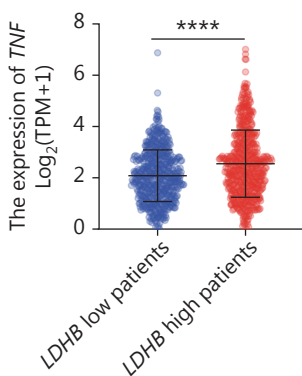**G**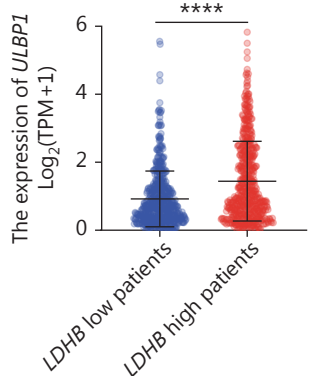

Supplement: media-1 [file media-1.pdf]

**A**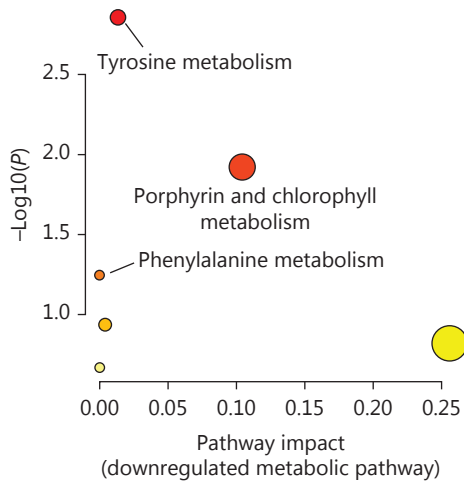**B**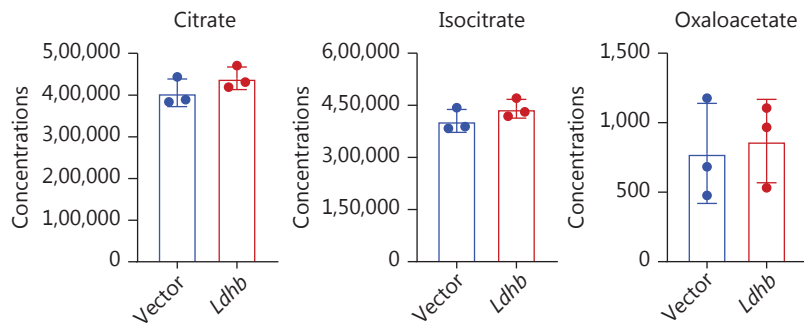**C**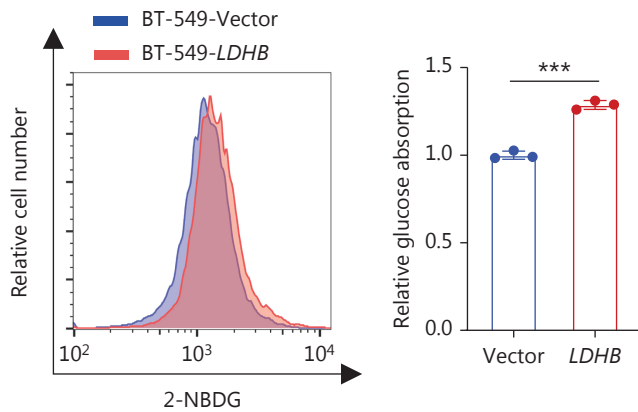

Supplement: media-3 [file media-3.pdf]

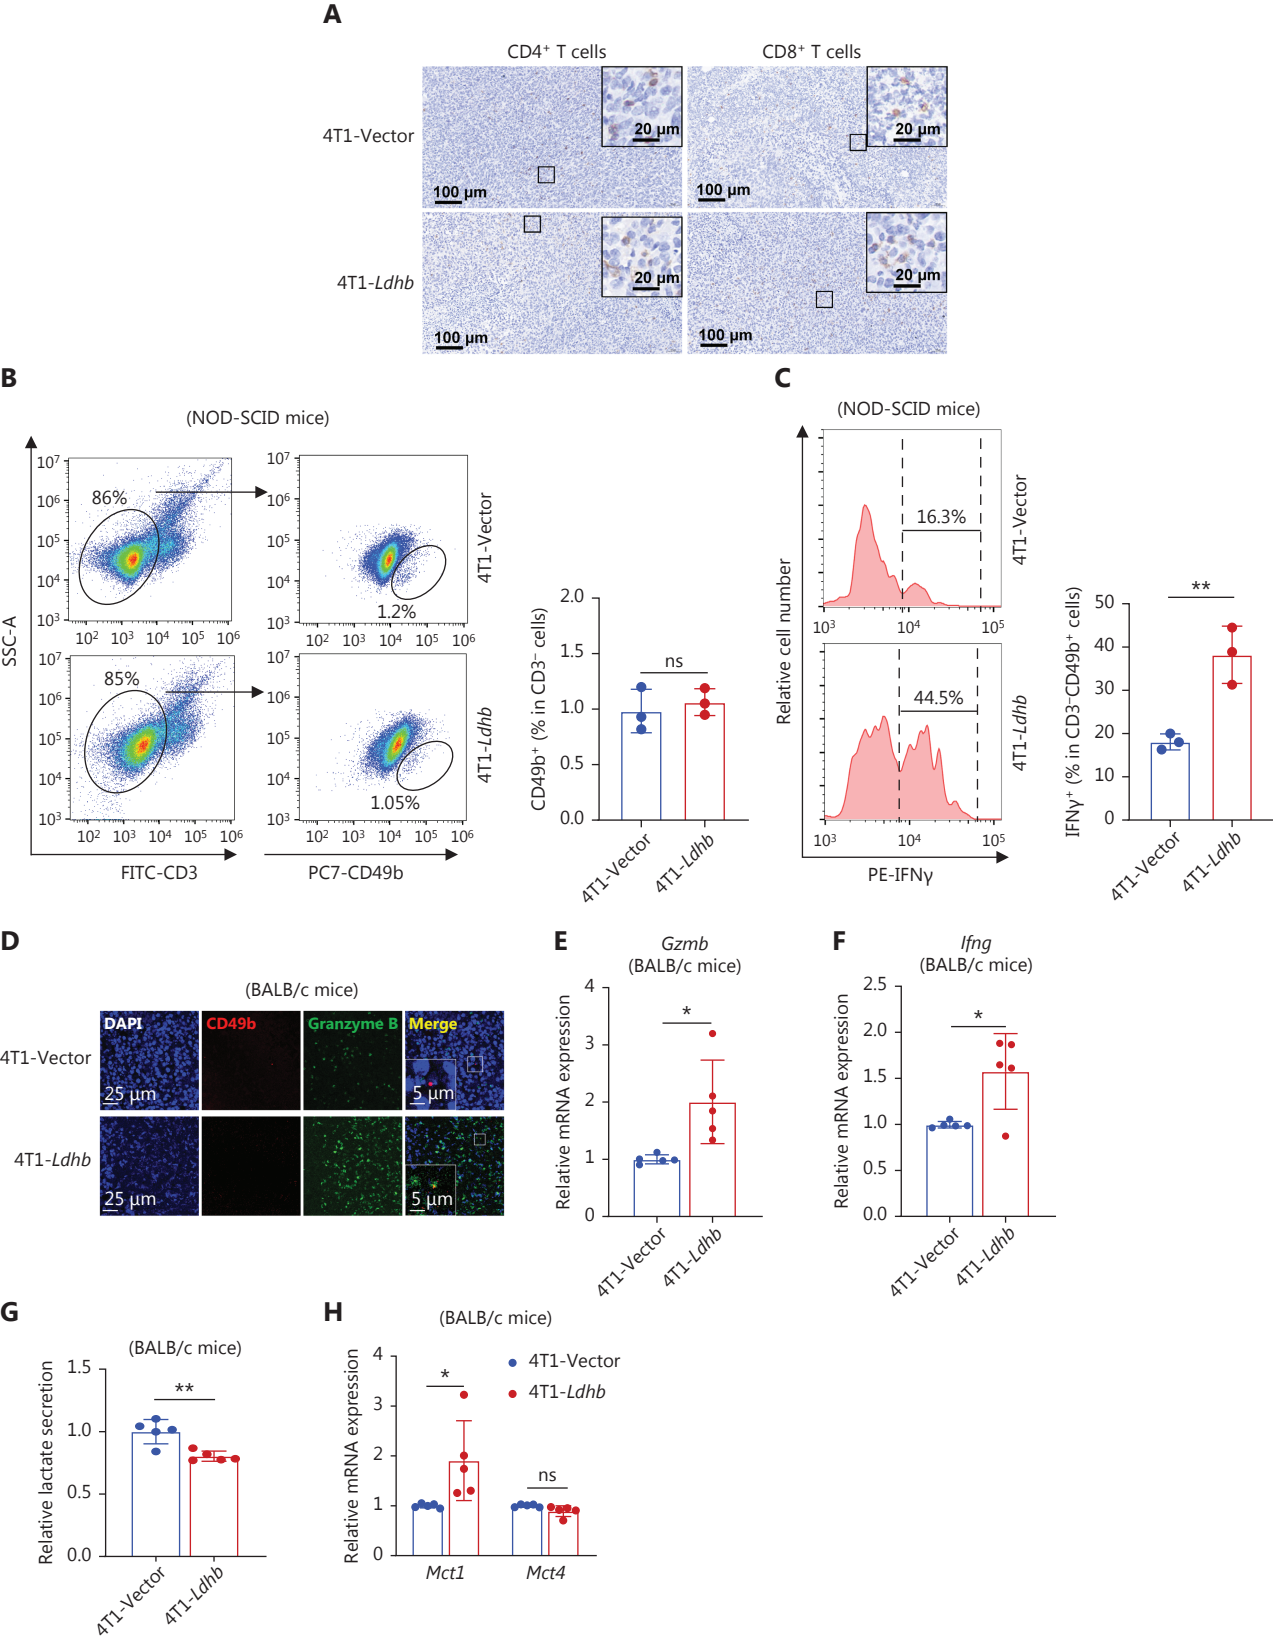

Supplement: media-4 [file media-4.pdf]

**A**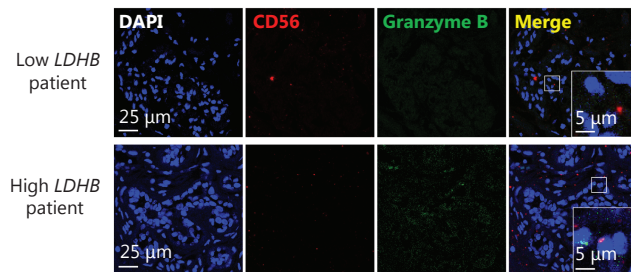**B**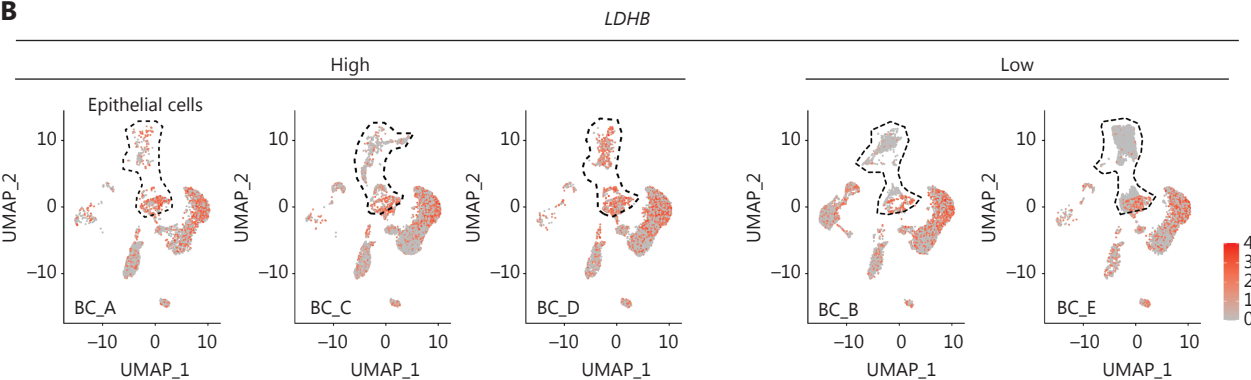**C**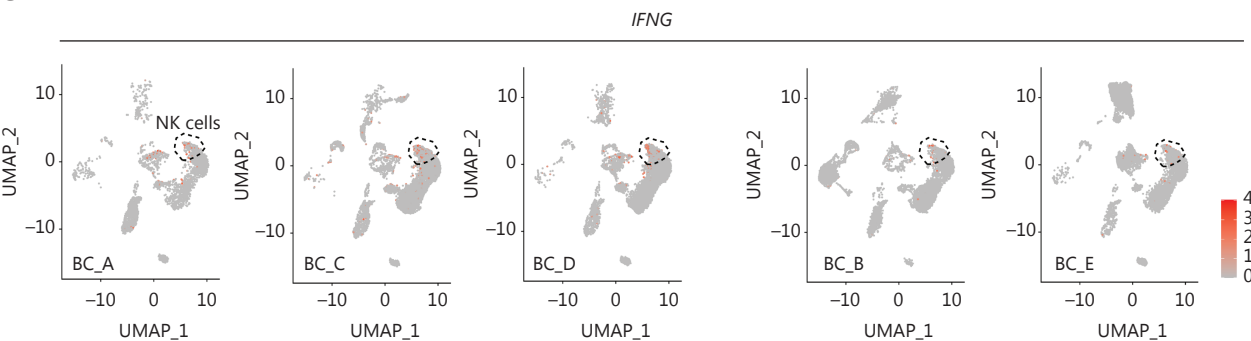**D**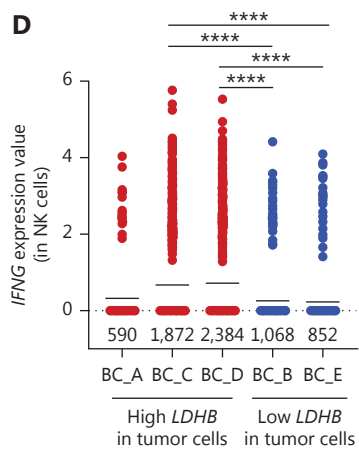

Supplement: media-5 [file media-5.pdf]
